# Supplementary material for: Federated disentangled representation learning for unsupervised brain anomaly detection
Source: Springer Nature journal article supplement (doi:10.1038/s42256-022-00515-2), 2022-08-25
Supplement: 42256_2022_515_MOESM1_ESM.pdf [file 42256_2022_515_MOESM1_ESM.pdf]

## Reporting Summary

Nature Portfolio wishes to improve the reproducibility of the work that we publish. This form provides structure for consistency and transparency in reporting. For further information on Nature Portfolio policies, see our [Editorial Policies](#) and the [Editorial Policy Checklist](#).

### Statistics

For all statistical analyses, confirm that the following items are present in the figure legend, table legend, main text, or Methods section.

- | n/a                                 | Confirmed                                                                                                                                                                                                                                                                           |
|-------------------------------------|-------------------------------------------------------------------------------------------------------------------------------------------------------------------------------------------------------------------------------------------------------------------------------------|
| <input type="checkbox"/>            | <input checked="" type="checkbox"/> The exact sample size ( $n$ ) for each experimental group/condition, given as a discrete number and unit of measurement                                                                                                                         |
| <input type="checkbox"/>            | <input checked="" type="checkbox"/> A statement on whether measurements were taken from distinct samples or whether the same sample was measured repeatedly                                                                                                                         |
| <input type="checkbox"/>            | <input checked="" type="checkbox"/> The statistical test(s) used AND whether they are one- or two-sided<br><i>Only common tests should be described solely by name; describe more complex techniques in the Methods section.</i>                                                    |
| <input checked="" type="checkbox"/> | <input type="checkbox"/> A description of all covariates tested                                                                                                                                                                                                                     |
| <input checked="" type="checkbox"/> | <input type="checkbox"/> A description of any assumptions or corrections, such as tests of normality and adjustment for multiple comparisons                                                                                                                                        |
| <input checked="" type="checkbox"/> | <input type="checkbox"/> A full description of the statistical parameters including central tendency (e.g. means) or other basic estimates (e.g. regression coefficient) AND variation (e.g. standard deviation) or associated estimates of uncertainty (e.g. confidence intervals) |
| <input type="checkbox"/>            | <input checked="" type="checkbox"/> For null hypothesis testing, the test statistic (e.g. $F$ , $t$ , $r$ ) with confidence intervals, effect sizes, degrees of freedom and $P$ value noted<br><i>Give <math>P</math> values as exact values whenever suitable.</i>                 |
| <input checked="" type="checkbox"/> | <input type="checkbox"/> For Bayesian analysis, information on the choice of priors and Markov chain Monte Carlo settings                                                                                                                                                           |
| <input checked="" type="checkbox"/> | <input type="checkbox"/> For hierarchical and complex designs, identification of the appropriate level for tests and full reporting of outcomes                                                                                                                                     |
| <input checked="" type="checkbox"/> | <input type="checkbox"/> Estimates of effect sizes (e.g. Cohen's $d$ , Pearson's $r$ ), indicating how they were calculated                                                                                                                                                         |

*Our web collection on [statistics for biologists](#) contains articles on many of the points above.*

### Software and code

Policy information about [availability of computer code](#)

|                 |                                                                                                                                                                                                                                                                                                                                                                            |
|-----------------|----------------------------------------------------------------------------------------------------------------------------------------------------------------------------------------------------------------------------------------------------------------------------------------------------------------------------------------------------------------------------|
| Data collection | No software was used for data collection as data was obtained from public datasets.                                                                                                                                                                                                                                                                                        |
| Data analysis   | <p>The code is made publicly available under <a href="https://github.com/albarqounilab/FedDis">https://github.com/albarqounilab/FedDis</a>. The following packages are used:</p> <pre> scikit_image==0.17.2 matplotlib==3.3.2 numpy==1.19.2 wandb==0.10.30 monai==0.6.0 plotly==5.1.0 PyYAML==5.4.1 scikit_learn==0.24.2 skimage==0.0 torch==1.9.0 Python &gt;= 3.6 </pre> |

For manuscripts utilizing custom algorithms or software that are central to the research but not yet described in published literature, software must be made available to editors and reviewers. We strongly encourage code deposition in a community repository (e.g. GitHub). See the Nature Portfolio [guidelines for submitting code & software](#) for further information.

## Data

Policy information about [availability of data](#)

All manuscripts must include a [data availability statement](#). This statement should provide the following information, where applicable:

- Accession codes, unique identifiers, or web links for publicly available datasets
- A description of any restrictions on data availability
- For clinical datasets or third party data, please ensure that the statement adheres to our [policy](#)

Most of the datasets used in this study are publicly available and can be downloaded after signing a Data Usage Agreement. The OASIS dataset is available at <https://www.oasis-brains.org>; the ADNI-S and ADNI-P datasets are available at <http://adni.loni.usc.edu/data-samples/access-data/>; the MSLUB dataset was available at <http://lit.fe.uni-lj.si/tools.php?lang=eng>; the MSISBI dataset is available at <https://smart-stats-tools.org/lesion-challenge-2015>; the WMH dataset is available at <https://wmh.isi.uu.nl>; and the BRATS 2018 dataset is available at <https://www.med.upenn.edu/sbia/brats2018/data.html>. For the prospective cohort, KRI, MSKRI, and GBKRI, upon reasonable request and signing of data transfer agreements and pending approval by our IRB and data protection officer, data can be shared.

## Field-specific reporting

Please select the one below that is the best fit for your research. If you are not sure, read the appropriate sections before making your selection.

- Life sciences       Behavioural & social sciences       Ecological, evolutionary & environmental sciences

For a reference copy of the document with all sections, see [nature.com/documents/nr-reporting-summary-flat.pdf](https://www.nature.com/documents/nr-reporting-summary-flat.pdf)

## Life sciences study design

All studies must disclose on these points even when the disclosure is negative.

|                 |                                                                                                                              |
|-----------------|------------------------------------------------------------------------------------------------------------------------------|
| Sample size     | All experimental design and data details are provided in the "Methods" section                                               |
| Data exclusions | All experimental design and data details are provided in the "Methods" section                                               |
| Replication     | All experimental design and data details are provided in the "Methods" section                                               |
| Randomization   | Randomization was not performed as this is not applicable to our Image analysis work where we don't study treatment effects. |
| Blinding        | Randomization was not performed as this is not applicable to our work as well                                                |

## Reporting for specific materials, systems and methods

We require information from authors about some types of materials, experimental systems and methods used in many studies. Here, indicate whether each material, system or method listed is relevant to your study. If you are not sure if a list item applies to your research, read the appropriate section before selecting a response.

### Materials & experimental systems

| n/a                                 | Involvement in the study                                        |
|-------------------------------------|-----------------------------------------------------------------|
| <input checked="" type="checkbox"/> | <input type="checkbox"/> Antibodies                             |
| <input checked="" type="checkbox"/> | <input type="checkbox"/> Eukaryotic cell lines                  |
| <input checked="" type="checkbox"/> | <input type="checkbox"/> Palaeontology and archaeology          |
| <input checked="" type="checkbox"/> | <input type="checkbox"/> Animals and other organisms            |
| <input type="checkbox"/>            | <input checked="" type="checkbox"/> Human research participants |
| <input checked="" type="checkbox"/> | <input type="checkbox"/> Clinical data                          |
| <input checked="" type="checkbox"/> | <input type="checkbox"/> Dual use research of concern           |

### Methods

| n/a                                 | Involvement in the study                                   |
|-------------------------------------|------------------------------------------------------------|
| <input checked="" type="checkbox"/> | <input type="checkbox"/> ChIP-seq                          |
| <input checked="" type="checkbox"/> | <input type="checkbox"/> Flow cytometry                    |
| <input type="checkbox"/>            | <input checked="" type="checkbox"/> MRI-based neuroimaging |

## Human research participants

Policy information about [studies involving human research participants](#)

|                            |                                                                                                                                                                                                                                                 |
|----------------------------|-------------------------------------------------------------------------------------------------------------------------------------------------------------------------------------------------------------------------------------------------|
| Population characteristics | All demographic details are provided in Figure 1                                                                                                                                                                                                |
| Recruitment                | For KRI, MSKRI, and GBKRI, all patients were part of in-house observational cohorts, some of which were prospective (MSKRI; with patient consent), while the others were retrospective (without patient consent).                               |
| Ethics oversight           | For all patients, our local IRB approved the use of imaging data for research purposes after anonymization. As several patients were part of retrospective cohorts without explicit patient consent, these data cannot be shared as mandated by |

our IRB. For the prospective cohort, upon reasonable request and signing of data transfer agreements and pending approval by our IRB and data protection officer, data can be shared.

Note that full information on the approval of the study protocol must also be provided in the manuscript.

## Magnetic resonance imaging

### Experimental design

|                                 |                                                                                |
|---------------------------------|--------------------------------------------------------------------------------|
| Design type                     | Structural MRI (FLAIR)                                                         |
| Design specifications           | All experimental design and data details are provided in the "Methods" section |
| Behavioral performance measures | not applicable                                                                 |

### Acquisition

|                               |                                                                                                                                                                                                                                                                                                                                                                                                                                                                                                                                                           |
|-------------------------------|-----------------------------------------------------------------------------------------------------------------------------------------------------------------------------------------------------------------------------------------------------------------------------------------------------------------------------------------------------------------------------------------------------------------------------------------------------------------------------------------------------------------------------------------------------------|
| Imaging type(s)               | Structural MRI                                                                                                                                                                                                                                                                                                                                                                                                                                                                                                                                            |
| Field strength                | 3T                                                                                                                                                                                                                                                                                                                                                                                                                                                                                                                                                        |
| Sequence & imaging parameters | OASIS-3: Resolution: 5x1x1, TR/TE/T1: Diverse<br>ADNI-S: Resolution: 5x0.9x0.9, TR/TE/T1: Diverse<br>ADNI-P: Resolution: 5x0.9x0.9, TR/TE/T1: 9/0.09/2.5<br>KRI: Resolution: 1.5x0.9x0.9, TR/TE/T1: 10/0.14/2.75<br>MSLUB: Resolution: 0.8x0.47x0.47, TR/TE/T1: 5/0.392/1.8<br>MSISBI: Resolution: 2.2x0.82x0.82, TR/TE/T1: 11/0.068/2.8<br>MSKRI: Resolution: 1.5x0.9x0.9, TR/TE/T1: 10/0.14/2.75<br>GBKRI: Resolution: 1.5x0.9x0.9, TR/TE/T1: 5/0.395/1.8<br>BRATS: Resolution: 1x1x1, TR/TE/T1: Diverse<br>WMH: Resolution: Diverse, TR/TE/T1: Diverse |
| Area of acquisition           | whole-brain                                                                                                                                                                                                                                                                                                                                                                                                                                                                                                                                               |
| Diffusion MRI                 | <input type="checkbox"/> Used <input checked="" type="checkbox"/> Not used                                                                                                                                                                                                                                                                                                                                                                                                                                                                                |

### Preprocessing

|                            |                                                                                                                                                                                                                    |
|----------------------------|--------------------------------------------------------------------------------------------------------------------------------------------------------------------------------------------------------------------|
| Preprocessing software     | All scans have been registered to the SRI24 atlas template space to ensure all data share the same volume size and orientation. Subsequently, the scans have been skull-stripped with ROBEX.                       |
| Normalization              | The brain MRI volumes were linearly normalized to the [0,1] range.                                                                                                                                                 |
| Normalization template     | <i>Describe the template used for normalization/transformation, specifying subject space or group standardized space (e.g. original Talairach, MNI305, ICBM152) OR indicate that the data were not normalized.</i> |
| Noise and artifact removal | No.                                                                                                                                                                                                                |
| Volume censoring           | No                                                                                                                                                                                                                 |

### Statistical modeling & inference

|                                                                           |                                                                                                                  |
|---------------------------------------------------------------------------|------------------------------------------------------------------------------------------------------------------|
| Model type and settings                                                   | deep learning methods were for processing the imaging data                                                       |
| Effect(s) tested                                                          | the ability to detect pathologies without providing annotations                                                  |
| Specify type of analysis:                                                 | <input checked="" type="checkbox"/> Whole brain <input type="checkbox"/> ROI-based <input type="checkbox"/> Both |
| Statistic type for inference<br>(See <a href="#">Eklund et al. 2016</a> ) | pixel-wise reconstruction                                                                                        |
| Correction                                                                | No correction was needed                                                                                         |

### Models & analysis

|                                               |                                                                                                      |
|-----------------------------------------------|------------------------------------------------------------------------------------------------------|
| n/a                                           | Involvement in the study                                                                             |
| <input checked="" type="checkbox"/>           | <input type="checkbox"/> Functional and/or effective connectivity                                    |
| <input checked="" type="checkbox"/>           | <input type="checkbox"/> Graph analysis                                                              |
| <input type="checkbox"/>                      | <input checked="" type="checkbox"/> Multivariate modeling or predictive analysis                     |
| Multivariate modeling and predictive analysis | Deep auto-encoding models were used in this manuscript to learn the normative prior of healthy brain |

Multivariate modeling and predictive analysis

images. This was used later on to reconstruct a pseudo healthy version of a given input data. The residual is then used to detect and segment anomalies (pathologies) in Brain MRI Imaging. DICE Score was used to evaluate the predicted segmented pathology.
